# Supplementary material for: Evaluation of RNAlater as a Field-Compatible Preservation Method for Metaproteomic Analyses of Bacterium-Animal Symbioses
Source: PubMed Central journal article supplement (PMC8549751; doi:10.1128/spectrum.01429-21), 2021-10-27
Supplement: spectrum.01429-21-s0001.pdf [file spectrum.01429-21-s0001.pdf]

# Supplemental material for “Evaluation of RNALater™ as a field-compatible preservation method for metaproteomic analyses of bacteria-animal symbioses”

**Authors:** Marlene Jensen<sup>1</sup>, Juliane Wippler<sup>2</sup>, Manuel Kleiner<sup>1</sup>

Affiliations:

1: North Carolina State University; Department of Plant & Microbial Biology, 112 Derieux Pl, 4510 Thomas Hall, Raleigh, NC 27695

2: Symbiosis Department, Max Planck Institute for Marine Microbiology, Celsiusstr. 1, D-28359, Bremen, Germany

**#corresponding authors**

[manuel\\_kleiner@ncsu.edu](mailto:manuel_kleiner@ncsu.edu), [mjensen2@ncsu.edu](mailto:mjensen2@ncsu.edu)

**Table S1: Sample overview for the preservation method comparison**

| Sample ID | Sample storage                                        | Species               |
|-----------|-------------------------------------------------------|-----------------------|
| 1         | Flash freeing in liquid nitrogen and stored @ -80°C   | <i>O. algarvensis</i> |
| 2         | Flash freeing in liquid nitrogen and stored @ -80°C   | <i>O. algarvensis</i> |
| 3         | Flash freeing in liquid nitrogen and stored @ -80°C   | <i>O. algarvensis</i> |
| 4         | Flash freeing in liquid nitrogen and stored @ -80°C   | <i>O. algarvensis</i> |
| 5         | Flash freeing in liquid nitrogen and stored @ -80°C   | <i>O. algarvensis</i> |
| 11        | RNALater™ incubated for 24 hours, and stored @ -80 °C | <i>O. algarvensis</i> |
| 12        | RNALater™ incubated for 24 hours and stored @ -80 °C  | <i>O. algarvensis</i> |
| 13        | RNALater™ incubated for 24 hours and stored @ -80 °C  | <i>O. algarvensis</i> |
| 14        | RNALater™ incubated for 24 hours and stored @ -80 °C  | <i>O. algarvensis</i> |
| 15        | RNALater™ incubated for 24 hours and stored @ -80 °C  | <i>O. algarvensis</i> |

**Table S2: Sample overview for the replication of the preservation method comparison**

| Sample ID | Sample storage                                       | Species               |
|-----------|------------------------------------------------------|-----------------------|
| 1_F       | Flash freezing in liquid nitrogen and stored @ -80°C | <i>O. algarvensis</i> |
| 2_F       | Flash freezing in liquid nitrogen and stored @ -80°C | <i>O. algarvensis</i> |
| 3_F       | Flash freezing in liquid nitrogen and stored @ -80°C | <i>O. algarvensis</i> |
| 4_F       | Flash freezing in liquid nitrogen and stored @ -80°C | <i>O. algarvensis</i> |
| 9_F       | Flash freezing in liquid nitrogen and stored @ -80°C | <i>O. algarvensis</i> |
| 10_F      | Flash freezing in liquid nitrogen and stored @ -80°C | <i>O. algarvensis</i> |
| 11_F      | Flash freezing in liquid nitrogen and stored @ -80°C | <i>O. algarvensis</i> |
| 12_F      | Flash freezing in liquid nitrogen and stored @ -80°C | <i>O. algarvensis</i> |
| 13_F      | Flash freezing in liquid nitrogen and stored @ -80°C | <i>O. algarvensis</i> |
| 14_F      | Flash freezing in liquid nitrogen and stored @ -80°C | <i>O. algarvensis</i> |
| t1_21_R   | RNAlater™ incubated for 24 hours and stored @ -80 °C | <i>O. algarvensis</i> |
| t1_22_R   | RNAlater™ incubated for 24 hours and stored @ -80 °C | <i>O. algarvensis</i> |
| t1_23_R   | RNAlater™ incubated for 24 hours and stored @ -80 °C | <i>O. algarvensis</i> |
| t1_24_R   | RNAlater™ incubated for 24 hours and stored @ -80 °C | <i>O. algarvensis</i> |
| t1_25_R   | RNAlater™ incubated for 24 hours and stored @ -80 °C | <i>O. algarvensis</i> |
| t1_26_R   | RNAlater™ incubated for 24 hours and stored @ -80 °C | <i>O. algarvensis</i> |
| t1_27_R   | RNAlater™ incubated for 24 hours and stored @ -80 °C | <i>O. algarvensis</i> |
| t1_28_R   | RNAlater™ incubated for 24 hours and stored @ -80 °C | <i>O. algarvensis</i> |
| t1_29_R   | RNAlater™ incubated for 24 hours and stored @ -80 °C | <i>O. algarvensis</i> |
| t1_30_R   | RNAlater™ incubated for 24 hours and stored @ -80 °C | <i>O. algarvensis</i> |

**Table S3: Sample overview for the RNAlater™ time series**

| Sample ID | Time point | Sample storage                                                  | Species               |
|-----------|------------|-----------------------------------------------------------------|-----------------------|
| 2         | t0         | Fixation in RNAlater™ for 24 h at 4 °C, then transfer to -80 °C | <i>O. algarvensis</i> |
| 3         | t0         | Fixation in RNAlater™ for 24 h at 4 °C, then transfer to -80 °C | <i>O. algarvensis</i> |
| 5         | t0         | Fixation in RNAlater™ for 24 h at 4 °C, then transfer to -80 °C | <i>O. algarvensis</i> |
| 7         | t0         | Fixation in RNAlater™ for 24 h at 4 °C, then transfer to -80 °C | <i>O. algarvensis</i> |
| 8         | t0         | Fixation in RNAlater™ for 24 h at 4 °C, then transfer to -80 °C | <i>O. algarvensis</i> |
| 13        | t0         | Fixation in RNAlater™ for 24 h at 4 °C, then transfer to -80 °C | <i>O. algarvensis</i> |
| 14        | t0         | Fixation in RNAlater™ for 24 h at 4 °C, then transfer to -80 °C | <i>O. algarvensis</i> |
| 15        | t0         | Fixation in RNAlater™ for 24 h at 4 °C, then transfer to -80 °C | <i>O. algarvensis</i> |
| 16        | t0         | Fixation in RNAlater™ for 24 h at 4 °C, then transfer to -80 °C | <i>O. algarvensis</i> |
| 17        | t0         | Fixation in RNAlater™ for 24 h at 4 °C, then transfer to -80 °C | <i>O. algarvensis</i> |
| 18        | t0         | Fixation in RNAlater™ for 24 h at 4 °C, then transfer to -80 °C | <i>O. ihvae</i>       |
| 46        | t1         | Kept in RNAlater™ at RT for 24 hours, then transfer to -80 °C   | <i>O. algarvensis</i> |
| 47        | t1         | Kept in RNAlater™ at RT for 24 hours, then transfer to -80 °C   | <i>O. algarvensis</i> |
| 48        | t1         | Kept in RNAlater™ at RT for 24 hours, then transfer to -80 °C   | <i>O. algarvensis</i> |
| 49        | t1         | Kept in RNAlater™ at RT for 24 hours, then transfer to -80 °C   | <i>O. algarvensis</i> |

|    |    |                                                               |                       |
|----|----|---------------------------------------------------------------|-----------------------|
| 51 | t1 | Kept in RNAlater™ at RT for 24 hours, then transfer to -80 °C | <i>O. algarvensis</i> |
| 52 | t1 | Kept in RNAlater™ at RT for 24 hours, then transfer to -80 °C | <i>O. algarvensis</i> |
| 32 | t2 | Kept in RNAlater™ at RT for 7 days, then transfer to -80 °C   | <i>O. algarvensis</i> |
| 34 | t2 | Kept in RNAlater™ at RT for 7 days, then transfer to -80 °C   | <i>O. algarvensis</i> |
| 36 | t2 | Kept in RNAlater™ at RT for 7 days, then transfer to -80 °C   | <i>O. algarvensis</i> |
| 38 | t2 | Kept in RNAlater™ at RT for 7 days, then transfer to -80 °C   | <i>O. algarvensis</i> |
| 40 | t2 | Kept in RNAlater™ at RT for 7 days, then transfer to -80 °C   | <i>O. algarvensis</i> |
| 41 | t2 | Kept in RNAlater™ at RT for 7 days, then transfer to -80 °C   | <i>O. algarvensis</i> |
| 42 | t2 | Kept in RNAlater™ at RT for 7 days, then transfer to -80 °C   | <i>O. algarvensis</i> |
| 44 | t2 | Kept in RNAlater™ at RT for 7 days, then transfer to -80 °C   | <i>O. algarvensis</i> |
| 19 | t3 | Kept in RNAlater™ at RT for 4 weeks, then transfer to -80 °C  | <i>O. algarvensis</i> |
| 21 | t3 | Kept in RNAlater™ at RT for 4 weeks, then transfer to -80 °C  | <i>O. algarvensis</i> |
| 23 | t3 | Kept in RNAlater™ at RT for 4 weeks, then transfer to -80 °C  | <i>O. algarvensis</i> |
| 24 | t3 | Kept in RNAlater™ at RT for 4 weeks, then transfer to -80 °C  | <i>O. algarvensis</i> |
| 25 | t3 | Kept in RNAlater™ at RT for 4 weeks, then transfer to -80 °C  | <i>O. algarvensis</i> |
| 26 | t3 | Kept in RNAlater™ at RT for 4 weeks, then transfer to -80 °C  | <i>O. algarvensis</i> |
| 27 | t3 | Kept in RNAlater™ at RT for 4 weeks, then transfer to -80 °C  | <i>O. algarvensis</i> |
| 30 | t3 | Kept in RNAlater™ at RT for 4 weeks, then transfer to -80 °C  | <i>O. algarvensis</i> |

**Table S4: Metaproteomics based measurements of per-species biomass of members of the *O. algarvensis* symbiosis.** Data are shown for *O. algarvensis* specimens used in the preservation method comparison. Calculations are based on a modified method of Kleiner et al. (Kleiner et al. 2017). Taxa were quantified using the sum of PSM counts for each species. Identified proteins were filtered for 5% FDR and at least 2 protein unique peptides (PUP) prior to counting. “Unassigned symbionts” is the total abundance of proteins identified with protein sequences that could not be assigned to a specific symbiont in previous metagenomics studies.

| Organism                    | Biomass frozen samples [%], n= 4 | Biomass RNAlater™ preserved samples [%], n = 4 |
|-----------------------------|----------------------------------|------------------------------------------------|
| δ1-symbiont                 | 0.78                             | 0.70                                           |
| δ1-symbiont                 | 1.41                             | 1.06                                           |
| δ1-symbiont                 | 0.70                             | 0.33                                           |
| δ1-symbiont                 | 0.33                             | 1.07                                           |
| δ3-symbiont                 | 0.00                             | 0.00                                           |
| δ3-symbiont                 | 0.00                             | 0.00                                           |
| δ3-symbiont                 | 0.00                             | 0.00                                           |
| δ3-symbiont                 | 0.00                             | 0.00                                           |
| δ4-symbiont                 | 1.74                             | 1.29                                           |
| δ4-symbiont                 | 1.97                             | 1.81                                           |
| δ4-symbiont                 | 1.40                             | 2.28                                           |
| δ4-symbiont                 | 1.42                             | 1.24                                           |
| <i>Cand. T. algarvensis</i> | 19.54                            | 14.48                                          |
| <i>Cand. T. algarvensis</i> | 14.56                            | 15.56                                          |
| <i>Cand. T. algarvensis</i> | 19.01                            | 13.77                                          |

|                             |       |       |
|-----------------------------|-------|-------|
| <i>Cand. T. algarvensis</i> | 17.33 | 10.11 |
| $\gamma$ 3-symbiont         | 1.36  | 0.86  |
| $\gamma$ 3-symbiont         | 0.61  | 1.11  |
| $\gamma$ 3-symbiont         | 0.89  | 0.94  |
| $\gamma$ 3-symbiont         | 1.55  | 0.98  |
| Host                        | 75.42 | 81.91 |
| Host                        | 80.65 | 79.58 |
| Host                        | 76.91 | 82.24 |
| Host                        | 78.80 | 85.89 |
| Spirochaete                 | 0.36  | 0.18  |
| Spirochaete                 | 0.19  | 0.23  |
| Spirochaete                 | 0.26  | 0.16  |
| Spirochaete                 | 0.06  | 0.35  |
| Unassigned symbionts        | 0.79  | 0.59  |
| Unassigned symbionts        | 0.63  | 0.65  |
| Unassigned symbionts        | 0.83  | 0.28  |
| Unassigned symbionts        | 0.51  | 0.36  |

**Table S5: Two-tailed Student’s t-test on the calculated per-species biomass of members of the *O. algarvensis* symbiosis.** Data are shown for *O. algarvensis* specimens used in the preservation method comparison.

| Organism                  | p-value<br>Frozen vs. RNA <sup>later</sup> <sup>TM</sup> |
|---------------------------|----------------------------------------------------------|
| $\delta$ 1-symbiont       | 0.97                                                     |
| $\delta$ 4-symbiont       | 0.95                                                     |
| <i>Cand.T.algarvensis</i> | 0.04                                                     |
| $\gamma$ 3-symbiont       | 0.60                                                     |
| Host                      | 0.04                                                     |
| Spirochaete               | 0.85                                                     |
| Unassigned symbionts      | 0.11                                                     |

**Table S6: Metaproteomics based measurements of per-species biomass of members of the *O. algarvensis* symbiosis.** Data are shown for *O. algarvensis* specimens used in the replication of the preservation method comparison. Calculations are based on a modified method of Kleiner et al. (Kleiner et al. 2017). Taxa were quantified using the sum of PSM counts for each species. Identified proteins were filtered for 5% FDR and at least 2 PUP prior to counting. “Unassigned symbionts” is the total abundance of proteins identified with protein sequences that could not be assigned to a specific symbiont in previous metagenomics studies.

| Organism            | Biomass frozen samples<br>[%] n= 8 | Biomass RNA <sup>later</sup> <sup>TM</sup> preserved samples [%]<br>n = 6 |
|---------------------|------------------------------------|---------------------------------------------------------------------------|
| $\delta$ 1-symbiont | 0.09                               | 0.25                                                                      |
| $\delta$ 1-symbiont | 0.51                               | 0.10                                                                      |
| $\delta$ 1-symbiont | 0.25                               | 0.13                                                                      |
| $\delta$ 1-symbiont | 0.08                               | 0.02                                                                      |

|                             |       |       |
|-----------------------------|-------|-------|
| δ1-symbiont                 | 0.06  | 0.16  |
| δ1-symbiont                 | 0.06  | 0.10  |
| δ1-symbiont                 | 0.54  | NA    |
| δ1-symbiont                 | 0.21  | NA    |
| δ4-symbiont                 | 1.14  | 0.39  |
| δ4-symbiont                 | 0.00  | 0.57  |
| δ4-symbiont                 | 1.00  | 0.40  |
| δ4-symbiont                 | 0.15  | 0.50  |
| δ4-symbiont                 | 0.23  | 0.31  |
| δ4-symbiont                 | 0.78  | 0.36  |
| δ4-symbiont                 | 1.02  | NA    |
| δ4-symbiont                 | 0.84  | NA    |
| <i>Cand. T. algarvensis</i> | 14.77 | 10.77 |
| <i>Cand. T. algarvensis</i> | 6.52  | 17.97 |
| <i>Cand. T. algarvensis</i> | 21.11 | 15.04 |
| <i>Cand. T. algarvensis</i> | 8.01  | 16.82 |
| <i>Cand. T. algarvensis</i> | 11.15 | 14.93 |
| <i>Cand. T. algarvensis</i> | 18.38 | 16.26 |
| <i>Cand. T. algarvensis</i> | 19.32 | NA    |
| <i>Cand. T. algarvensis</i> | 21.66 | NA    |
| γ3-symbiont                 | 0.77  | 0.57  |
| γ3-symbiont                 | 0.56  | 0.57  |
| γ3-symbiont                 | 0.68  | 0.74  |
| γ3-symbiont                 | 0.31  | 0.50  |
| γ3-symbiont                 | 0.43  | 0.69  |
| γ3-symbiont                 | 0.65  | 0.57  |
| γ3-symbiont                 | 0.94  | NA    |
| γ3-symbiont                 | 0.46  | NA    |
| Host                        | 82.62 | 87.70 |
| Host                        | 91.46 | 80.18 |
| Host                        | 76.01 | 83.01 |
| Host                        | 91.13 | 81.78 |
| Host                        | 87.93 | 83.70 |
| Host                        | 79.38 | 82.36 |
| Host                        | 77.79 | NA    |
| Host                        | 75.85 | NA    |
| Spiro                       | 0.31  | 0.05  |
| Spiro                       | 0.00  | 0.10  |
| Spiro                       | 0.17  | 0.10  |
| Spiro                       | 0.08  | 0.04  |
| Spiro                       | 0.06  | 0.03  |
| Spiro                       | 0.07  | 0.12  |
| Spiro                       | 0.07  | NA    |
| Spiro                       | 0.17  | NA    |

|            |      |      |
|------------|------|------|
| Unassigned | 0.30 | 0.26 |
| Unassigned | 0.95 | 0.51 |
| Unassigned | 0.77 | 0.58 |
| Unassigned | 0.23 | 0.34 |
| Unassigned | 0.15 | 0.17 |
| Unassigned | 0.69 | 0.25 |
| Unassigned | 0.31 | NA   |
| Unassigned | 0.81 | NA   |

**Table S7: Two-tailed Student's t-test on the calculated per-species biomass of members of the *O. algarvensis* symbiosis.** Data are shown for *O. algarvensis* specimens used in the replication of the preservation method comparison

| Organism                  | p-value<br>Frozen vs. RNAlater™ |
|---------------------------|---------------------------------|
| δ1-symbiont               | 0.23                            |
| δ4-symbiont               | 0.21                            |
| <i>Cand.T.algarvensis</i> | 0.94                            |
| γ3-symbiont               | 0.95                            |
| Host                      | 0.89                            |
| Spirochaete               | 0.36                            |
| Unassigned symbionts      | 0.20                            |

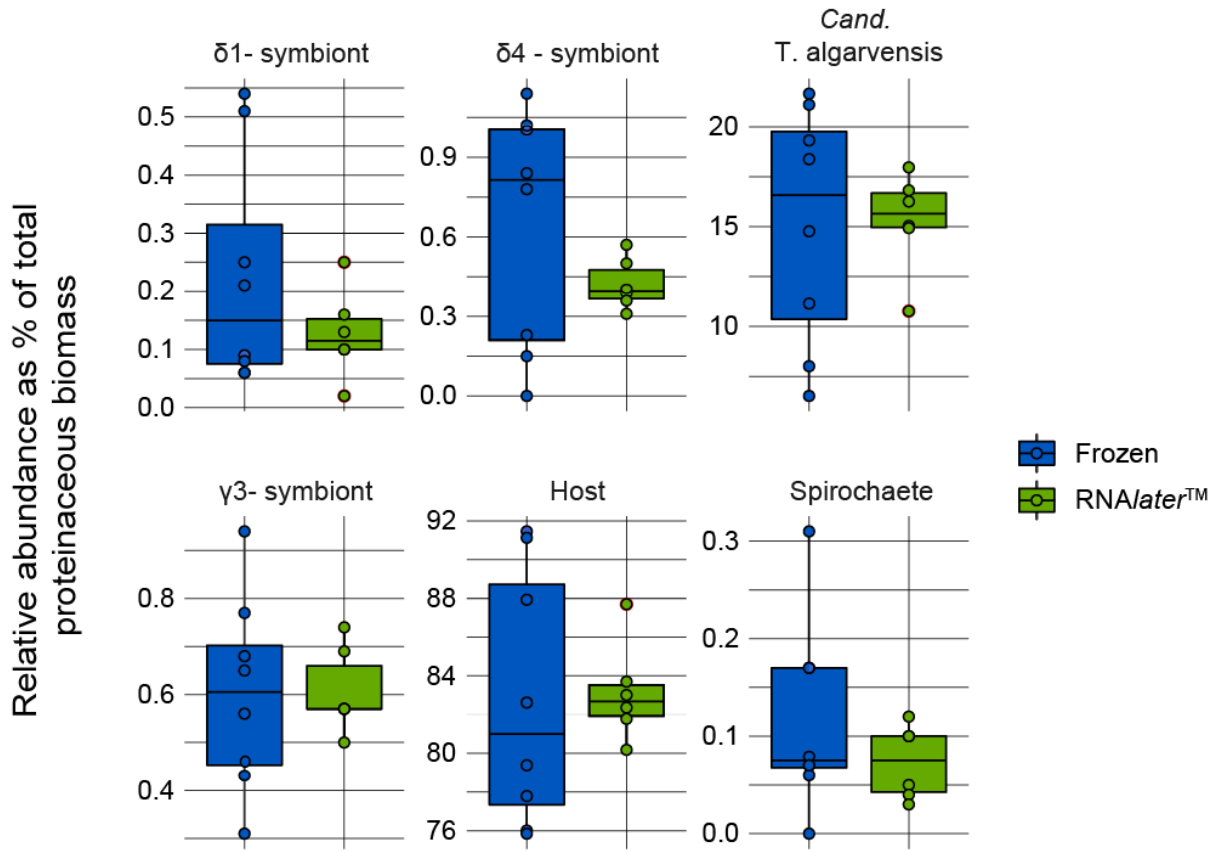

**Figure S1: Metaproteomics based measurements of per-species biomass of members of the *O. algarvensis* symbiosis.** Data for individual *O. algarvensis* specimens are shown for specimens used in the preservation method comparison. Taxa were quantified using the sum of PSM counts for each species respectively. Identified proteins were filtered for 5% FDR and at least 2 PUP prior to counting.

**Table S8: Metaproteomics based measurements of per-species biomass of members of the *O. algarvensis* symbiosis.** Data are shown for *O. algarvensis* specimens used in the RNAlater™ time series. Calculations are based on a modified method of Kleiner et al. (Kleiner et al. 2017). Taxa were quantified using the sum of PSM counts for each species respectively. Identified proteins were filtered for 5% FDR and at least 2 PUP prior to counting. “Unassigned symbionts” is the total abundance of proteins identified with protein sequences that could not be assigned to a specific symbiont in previous metagenomics studies.

| Organism    | Biomass t0 [%]<br>n= 7 | Biomass 1 day [%]<br>n= 4 | Biomass 1 week [%]<br>n= 7 | Biomass 4 weeks [%] n=<br>7 |
|-------------|------------------------|---------------------------|----------------------------|-----------------------------|
| δ1-symbiont | 0.12                   | 0.24                      | 0.08                       | 0.29                        |
| δ1-symbiont | 0.16                   | 0.20                      | 0.74                       | 0.32                        |
| δ1-symbiont | 0.24                   | 0.38                      | 0.26                       | 0.14                        |
| δ1-symbiont | 0.42                   | 0.36                      | 0.15                       | 0.10                        |
| δ1-symbiont | 0.09                   | NA                        | 0.29                       | 0.48                        |
| δ1-symbiont | 0.18                   | NA                        | 0.70                       | 0.13                        |
| δ1-symbiont | 0.35                   | NA                        | 0.27                       | 0.36                        |
| δ3-symbiont | 0.00                   | 0.00                      | 0.00                       | 0.00                        |
| δ3-symbiont | 0.00                   | 0.00                      | 0.00                       | 0.00                        |
| δ3-symbiont | 0.00                   | 0.00                      | 0.00                       | 0.00                        |

|                            |       |       |       |       |
|----------------------------|-------|-------|-------|-------|
| δ3-symbiont                | 0.00  | 0.00  | 0.00  | 0.00  |
| δ3-symbiont                | 0.00  | NA    | 0.01  | 0.01  |
| δ3-symbiont                | 0.01  | NA    | 0.00  | 0.00  |
| δ3-symbiont                | 0.00  | NA    | 0.02  | 0.00  |
| δ4-symbiont                | 0.76  | 0.85  | 0.39  | 0.46  |
| δ4-symbiont                | 0.44  | 0.33  | 0.01  | 0.43  |
| δ4-symbiont                | 0.42  | 0.42  | 0.52  | 0.51  |
| δ4-symbiont                | 0.58  | 0.37  | 0.36  | 0.29  |
| δ4-symbiont                | 0.40  | NA    | 0.40  | 0.43  |
| δ4-symbiont                | 0.46  | NA    | 0.45  | 0.92  |
| δ4-symbiont                | 0.35  | NA    | 0.46  | 0.49  |
| <i>Cand.T. algarvensis</i> | 31.28 | 20.55 | 22.84 | 27.92 |
| <i>Cand.T. algarvensis</i> | 27.58 | 29.34 | 32.29 | 24.31 |
| <i>Cand.T. algarvensis</i> | 21.46 | 28.41 | 21.40 | 24.39 |
| <i>Cand.T. algarvensis</i> | 22.81 | 24.25 | 27.86 | 29.82 |
| <i>Cand.T. algarvensis</i> | 24.91 | NA    | 21.76 | 27.33 |
| <i>Cand.T. algarvensis</i> | 26.14 | NA    | 30.26 | 24.14 |
| <i>Cand.T. algarvensis</i> | 22.36 | NA    | 27.64 | 24.82 |
| γ3-symbiont                | 0.83  | 0.86  | 1.05  | 1.22  |
| γ3-symbiont                | 0.98  | 1.34  | 0.00  | 1.09  |
| γ3-symbiont                | 1.28  | 1.32  | 0.80  | 0.84  |
| γ3-symbiont                | 0.65  | 1.15  | 1.26  | 1.07  |
| γ3-symbiont                | 0.50  | NA    | 1.19  | 1.09  |
| γ3-symbiont                | 1.13  | NA    | 1.40  | 0.78  |
| γ3-symbiont                | 0.97  | NA    | 1.03  | 1.01  |
| Host                       | 65.01 | 76.11 | 74.63 | 69.95 |
| Host                       | 69.55 | 67.01 | 64.85 | 72.61 |
| Host                       | 75.25 | 68.04 | 75.60 | 71.83 |
| Host                       | 74.12 | 72.65 | 68.31 | 68.50 |
| Host                       | 72.50 | NA    | 75.15 | 72.32 |
| Host                       | 71.37 | NA    | 65.09 | 72.20 |
| Host                       | 74.65 | NA    | 68.98 | 67.86 |
| Spirochaete                | 0.11  | 0.04  | 0.07  | 0.03  |
| Spirochaete                | 0.02  | 0.05  | 0.07  | 0.08  |
| Spirochaete                | 0.08  | 0.13  | 0.04  | 0.10  |
| Spirochaete                | 0.04  | 0.06  | 0.03  | 0.04  |
| Spirochaete                | 0.05  | NA    | 0.06  | 0.00  |
| Spirochaete                | 0.09  | NA    | 0.07  | 0.05  |
| Spirochaete                | 0.10  | NA    | 0.00  | 0.02  |
| Unassigned symbionts       | 1.90  | 1.35  | 0.94  | 0.70  |
| Unassigned symbionts       | 1.26  | 1.74  | 2.04  | 1.38  |
| Unassigned symbionts       | 1.26  | 1.31  | 1.38  | 1.46  |
| Unassigned symbionts       | 1.38  | 1.16  | 2.04  | 1.57  |
| Unassigned symbionts       | 1.55  | NA    | 1.13  | 1.47  |
| Unassigned symbionts       | 0.62  | NA    | 2.03  | 1.82  |



|                      |      |    |      |      |
|----------------------|------|----|------|------|
| Unassigned symbionts | 1.22 | NA | 1.60 | 0.82 |
|----------------------|------|----|------|------|

**Table S9: Two-tailed Student's t-test on the calculated per-species biomass of members of the *O. algarvensis* symbiosis.** Data are shown for *O. algarvensis* specimens used in the RNAlater™ time series.

| Organism                    | p-value<br>t0 vs. 1 day | p-value<br>t0 vs. 1 week | p-value<br>t0 vs. 4 weeks |
|-----------------------------|-------------------------|--------------------------|---------------------------|
| δ1-symbiont                 | 0.28                    | 0.25                     | 0.61                      |
| δ3-symbiont                 | 0.36                    | 0.45                     | 0.93                      |
| δ4-symbiont                 | 0.97                    | 0.18                     | 0.85                      |
| <i>Cand. T. algarvensis</i> | 0.87                    | 0.62                     | 0.58                      |
| γ3-symbiont                 | 0.13                    | 0.79                     | 0.39                      |
| Host                        | 0.75                    | 0.54                     | 0.52                      |
| Spirochaete                 | 0.94                    | 0.21                     | 0.19                      |
| Unassigned symbionts        | 0.70                    | 0.24                     | 0.98                      |
